# Supplementary material for: Novel protein–inorganic nanoparticles prepared by inorganic replication of self-assembled clathrin cages and triskelia
Source: Royal Society of Chemistry journal article supplement (doi:10.1039/b803437k), 2008-01-01
Supplement: b803437k.pdf [file b803437k.pdf]

B803437K - Soft Matter

## Novel protein/inorganic nanoparticles prepared by inorganic replication of self-assembled clathrin cages and triskelia

Sajanikumari Sadasivan,<sup>a</sup> Avinash J. Patil,<sup>a</sup> Keith M. Bromley,<sup>a</sup> Peter G. R. Hastie,<sup>b</sup> George Banting,<sup>b</sup> Stephen Mann.<sup>a\*</sup>

### Supporting information: Figure S1

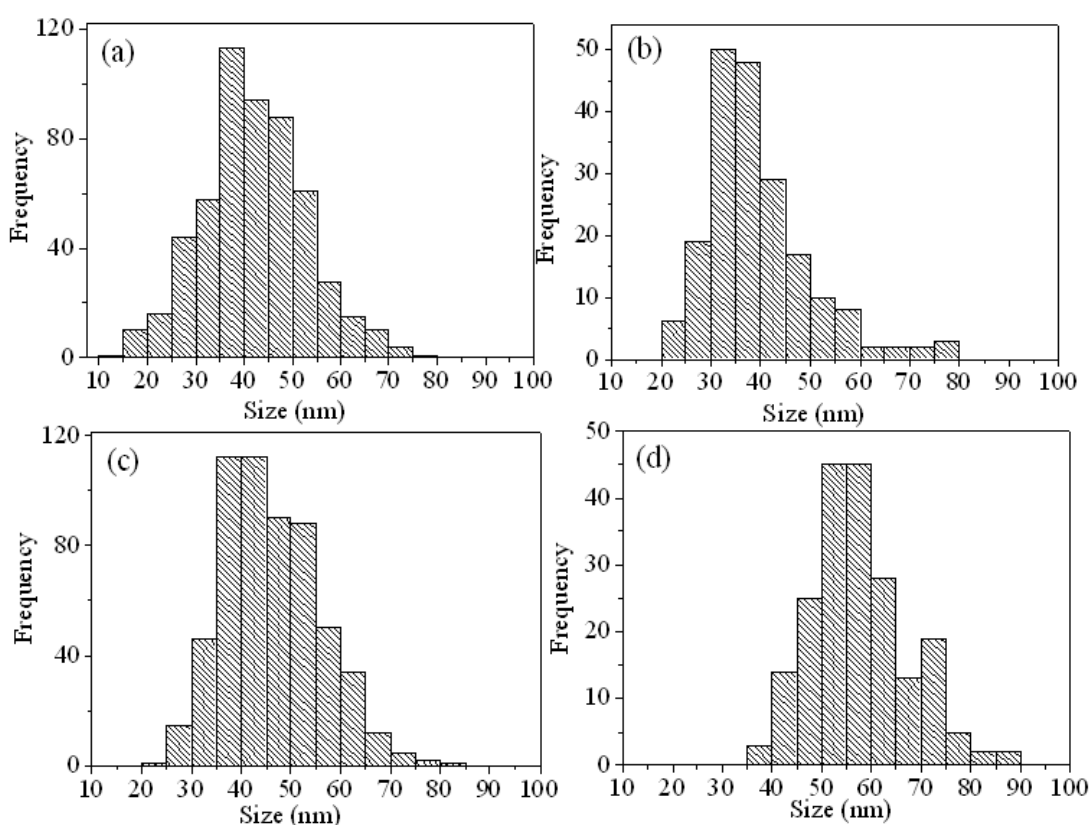

**Figure S1** Particle size histograms for (a) unmineralized clathrin cages, and clathrin cage/inorganic nanoparticles prepared in the presence of (b) organoclay clusters, (c) organosilica oligomers, and (d) CdS.

**Supporting Information: Figure S2**

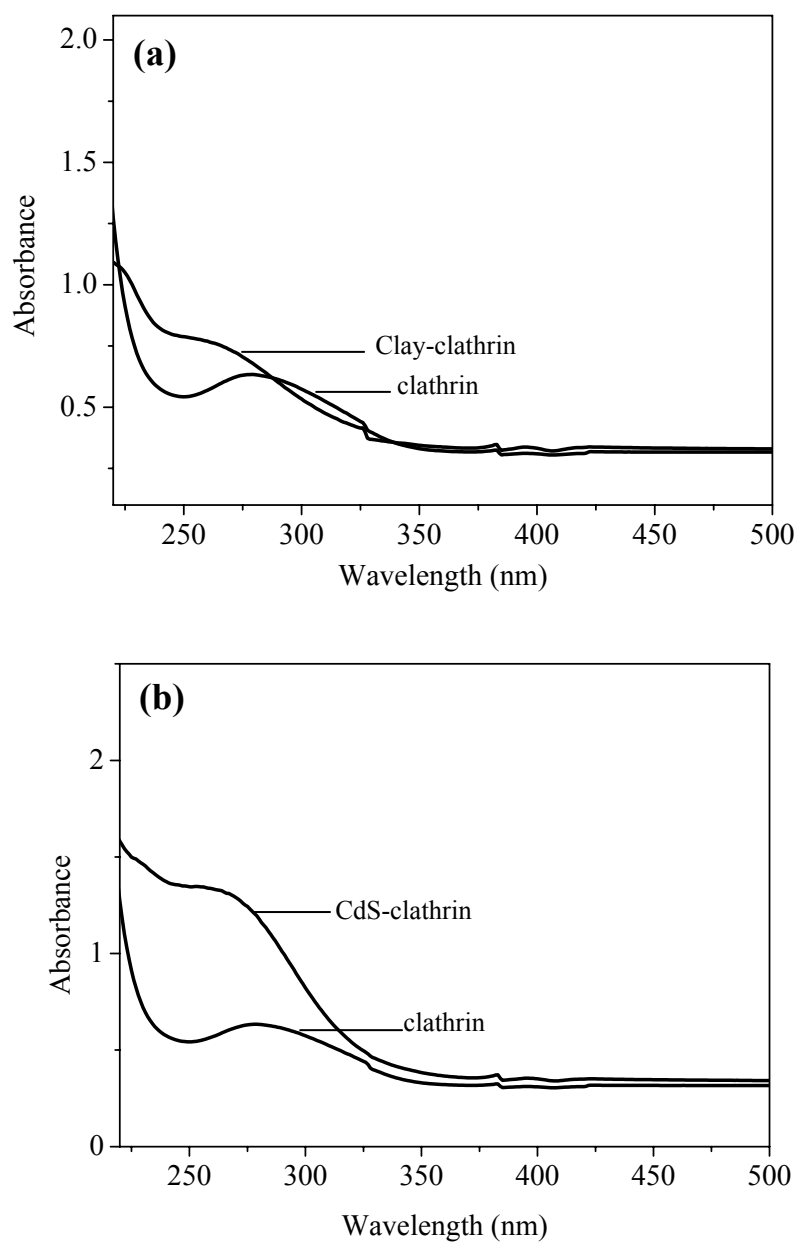

**Figure S2.** UV-Vis spectra for (a) unmineralized clathrin cages, and organoclay- or organosilica-coated clathrin cages, (b) unmineralized clathrin cages and CdS-decorated constructs.

**Supporting information: Figure-S3**

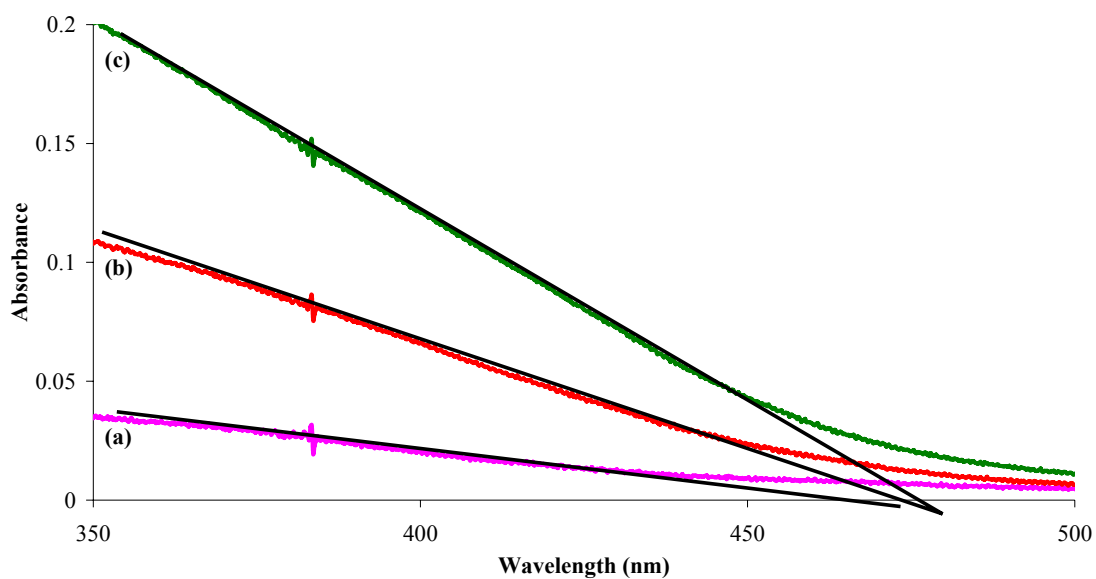

**Figure S3.** UV-Vis absorption edge profiles for CdS/clathrin constructs prepared at constant clathrin concentration but with CdS : clathrin molar ratios of (a) 3870, (b) 6450 and (c) 12900, corresponding to CdS particle sizes of 5, 6 or 7 nm, respectively.
